# Supplementary material for: Detection and Genetic Characterization of Seoul Virus in Liver Tissue Samples From Rattus norvegicus and Rattus tanezumi in Urban Areas of Southern China
Source: PubMed Central journal article supplement (PMC8710597; doi:10.3389/fvets.2021.748232), 2021-12-13
Supplement: Table_1.pdf [file Table_1.pdf]

Additional file 1. Primers for viral amplification

| Primer  | Orientation                | Sequence (5'-3')          | Target fragment (base pairs) |
|---------|----------------------------|---------------------------|------------------------------|
| S-F1    | Sense (first/second round) | TAGTAGTAGACTCCCTAAAGAG    | 928                          |
| S-R928  | Antisense (second round)   | GGTGACTIONAATATGTTCAAC    |                              |
| S-R979  | Antisense (first round)    | CATGTTGGTGGACACCTATC      |                              |
| S-F894  | Sense (first/second round) | CAGGCAACATTCAAAGGATGC     | 824                          |
| S-R1717 | Antisense (second round)   | GAAACAACCTTAATGAGGTAGTATA |                              |
| S-R1746 | Antisense (first round)    | AGTAGTAKRCTCCCTAAAAAGAC   |                              |
| M-F1    | Sense (first/second round) | TAGTAGTAGACTCCGCAAG       | 1034                         |
| M-R1034 | Antisense (second round)   | CTAAATATGAAACGACCATCTTC   |                              |
| M-R1143 | Antisense (first round)    | CTGGACTGCCTCATAGTATC      |                              |
| M-F681  | Sense (first/second round) | CATCAGAAAGGGAATACATATAAG  | 724                          |
| MR1404  | Antisense (second round)   | CAGTGAAAAGAGACTTGTAATAG   |                              |
| MR1452  | Antisense (first round)    | CTGGAACACACARCTCAATAG     |                              |
| M-F1245 | Sense (first/second round) | CTCCAATGTGTCTGGTGTCT      | 1251                         |
| M-R2495 | Antisense (second round)   | CACAAAGCAATCATTATATC      |                              |
| M-R2545 | Antisense (first round)    | GAGAGAACTTAGATACAGTC      |                              |
| M-F2364 | Sense (first/second round) | CAGGTTGTACTGCTTGTGGATT    | 961                          |
| M-R3324 | Antisense (second round)   | GATTATACCCATAACCCATTAC    |                              |
| M-R3587 | Antisense (first round)    | CAATAAAAGATTGGGAGATAG     |                              |
| L- F1   | Sense (first/second round) | TAGTAGTAGACTCCGGAAGAG     | 1028                         |
| L-R1028 | Antisense (second round)   | CCATATCATGTGCAAGAATAG     |                              |
| L-R1099 | Antisense (first round)    | GGGCTAAATTGGATTCTAGG      |                              |
| L-F935  | Sense (first/second round) | CAGCATACAAACCTGCAACTATAC  | 1331                         |
| L-R2266 | Antisense (second round)   | CTTTGTTGCCCATCTACAGTTTC   |                              |
| L-R2305 | Antisense (first round)    | CAACTAACATCTCACCATACTTATC |                              |
| L-F2227 | Sense (first/second round) | TTGCATGGGAATGTGAATGAAG    | 992                          |
| L-R3219 | Antisense (second round)   | CAAATAATGATGAGCACTTGTTTC  |                              |
| L-R3282 | Antisense (first round)    | GCAGTCYAATTCTGGAAATAAC    |                              |
| L-F3136 | Sense (first/second round) | GAACCTCATGTCAGAGACTTC     | 984                          |
| L-R4119 | Antisense (second round)   | CATATGTAGGATGCTGTTCACTC   |                              |
| L-R4209 | Antisense (first round)    | GCATAGTCATAGCTGTTATAATG   |                              |
| L-F3989 | Sense (first/second round) | CTGGTGAGACATTTTCAGCATG    | 1128                         |
| L-R5117 | Antisense (second round)   | ATTGGCTTGGAGTTGTAACACTG   |                              |
| L-R5121 | Antisense (first round)    | CTATTGGCTTGGAGTTGTAAC     |                              |
| L-F5076 | Sense (first/second round) | GTGTGCAGCATTGATGATTGC     | 1316                         |
| L-R6392 | Antisense (second round)   | CTGGAATCACATCCTCAGGTA     |                              |
| L-R6457 | Antisense (first round)    | GAAACTGAATCCTGTGGAAATAG   |                              |

Additional file 2. Nucleotide and amino acid identities (%) of PCR screening sequences in different samples from the same animal.

|                     | XM4 <sup>b</sup>   | XM47 <sup>a</sup>  | XM49 <sup>b</sup>  | MM23 <sup>b</sup>  | MM32 <sup>b</sup>  | YN11 <sup>b</sup>  | YN45 <sup>b</sup>  | YY27 <sup>b</sup>  | YY40 <sup>b</sup>  | YY55 <sup>b</sup>  | GZ15 <sup>b</sup>  | GZ4 <sup>b</sup>   |
|---------------------|--------------------|--------------------|--------------------|--------------------|--------------------|--------------------|--------------------|--------------------|--------------------|--------------------|--------------------|--------------------|
| Nucleotide identity | 99.6               | 99.0-99.6          | 99.3               | 99.3               | 99.6               | 99.3               | 99.3               | 99.6               | 99.6               | 99.6               | 99.3               | 99.3               |
| Amino acid identity | 100                | 100                | 100                | 100                | 100                | 100                | 100                | 100                | 100                | 100                | 100                | 100                |
|                     | GZ47 <sup>b</sup>  | GZ48 <sup>b</sup>  | GZ50 <sup>b</sup>  | GZ52 <sup>b</sup>  | GZ59 <sup>b</sup>  | GZ213 <sup>b</sup> | GZ219 <sup>b</sup> | GZ223 <sup>b</sup> | GZ224 <sup>b</sup> | GZ263              | GZ264 <sup>b</sup> | GZ325 <sup>a</sup> |
| Nucleotide identity | 100                | 99.6               | 99.3               | 99.6               | 99.6               | 99.6               | 99.6               | 99.3               | 99.6               | -                  | 99.3               | 99.0-99.6          |
| Amino acid identity | 100                | 100                | 100                | 100                | 100                | 100                | 100                | 99.0               | 100                | -                  | 100                | 100                |
|                     | GZ326 <sup>b</sup> | GZ329 <sup>b</sup> | GZ330 <sup>b</sup> | GZ333 <sup>b</sup> | GZ431 <sup>b</sup> | GZ437 <sup>b</sup> | GZ462 <sup>b</sup> | GZ464 <sup>b</sup> | GZ466 <sup>b</sup> | GZ471 <sup>b</sup> | GZ473 <sup>a</sup> | GZ488 <sup>b</sup> |
| Nucleotide identity | 99.3               | 99.3               | 99.3               | 99.6               | 99.0               | 99.3               | 99.0               | 99.0               | 99.0               | 99.3               | 99.6-100           | 99.0               |
| Amino acid identity | 100                | 100                | 100                | 100                | 100                | 100                | 100                | 100                | 100                | 100                | 100                | 100                |

a: Animals that have Seoul virus-positive liver tissue, lung tissue and serum samples.

b: Animals that have Seoul virus-positive liver tissue and lung tissue samples.

Additional file 3. Nucleotide and amino acid identities of the near full-length S segments

|                 | YY2<br>7         | GZ15             | GZ325            | GZ47<br>3        | MM23             | GZ45             | XM47             | YN45             | GZ488            | NC_03<br>8514.1  | MG923<br>674.1   | MN258<br>253.1   | MN47<br>8397.1   | MK360<br>784.1   | KY9787<br>55.1   | U37768.<br>1     | JX8535<br>75.1   | JX8797<br>69.1   |
|-----------------|------------------|------------------|------------------|------------------|------------------|------------------|------------------|------------------|------------------|------------------|------------------|------------------|------------------|------------------|------------------|------------------|------------------|------------------|
| YY27            | ID<br>(1.000)    | 0.991<br>(0.990) | 0.982<br>(0.990) | 0.979<br>(0.993) | 0.979<br>(0.993) | 0.986<br>(0.995) | 0.990<br>(0.997) | 0.986<br>(1.000) | 0.986<br>(1.000) | 0.560<br>(0.500) | 0.620<br>(0.628) | 0.617<br>(0.644) | 0.726<br>(0.827) | 0.965<br>(0.995) | 0.740<br>(0.822) | 0.743<br>(0.832) | 0.968<br>(0.997) | 0.967<br>(1.000) |
| GZ15            | 0.991<br>(1.000) | ID               | 0.982<br>(0.990) | 0.982<br>(0.993) | 0.980<br>(0.993) | 0.986<br>(0.995) | 0.991<br>(0.997) | 0.985<br>(1.000) | 0.986<br>(1.000) | 0.563<br>(0.500) | 0.621<br>(0.628) | 0.617<br>(0.644) | 0.727<br>(0.827) | 0.964<br>(0.995) | 0.742<br>(0.822) | 0.744<br>(0.832) | 0.967<br>(0.997) | 0.968<br>(1.000) |
| GZ325           | 0.982<br>(0.990) | 0.982<br>(0.990) | ID               | 0.982<br>(0.997) | 0.985<br>(0.997) | 0.981<br>(0.990) | 0.982<br>(0.988) | 0.975<br>(0.990) | 0.976<br>(0.990) | 0.554<br>(0.495) | 0.616<br>(0.623) | 0.613<br>(0.637) | 0.721<br>(0.820) | 0.956<br>(0.986) | 0.736<br>(0.815) | 0.735<br>(0.825) | 0.959<br>(0.988) | 0.958<br>(0.990) |
| GZ473           | 0.979<br>(0.993) | 0.978<br>(0.993) | 0.982<br>(0.997) | ID               | 0.992<br>(1.000) | 0.972<br>(0.988) | 0.979<br>(0.990) | 0.988<br>(0.993) | 0.992<br>(0.993) | 0.556<br>(0.495) | 0.615<br>(0.625) | 0.611<br>(0.639) | 0.721<br>(0.820) | 0.957<br>(0.988) | 0.731<br>(0.815) | 0.737<br>(0.825) | 0.958<br>(0.990) | 0.956<br>(0.993) |
| MM23            | 0.979<br>(0.993) | 0.980<br>(0.993) | 0.985<br>(0.997) | 0.992<br>(1.000) | ID               | 0.976<br>(0.988) | 0.981<br>(0.990) | 0.986<br>(0.993) | 0.986<br>(0.993) | 0.558<br>(0.495) | 0.616<br>(0.625) | 0.610<br>(0.639) | 0.721<br>(0.820) | 0.958<br>(0.988) | 0.734<br>(0.815) | 0.736<br>(0.825) | 0.963<br>(0.990) | 0.959<br>(0.993) |
| GZ45            | 0.986<br>(0.995) | 0.986<br>(0.995) | 0.981<br>(0.990) | 0.972<br>(0.988) | 0.976<br>(0.988) | ID               | 0.986<br>(0.993) | 0.979<br>(0.995) | 0.980<br>(0.995) | 0.558<br>(0.500) | 0.618<br>(0.623) | 0.612<br>(0.639) | 0.730<br>(0.825) | 0.961<br>(0.990) | 0.740<br>(0.820) | 0.742<br>(0.829) | 0.963<br>(0.993) | 0.964<br>(0.995) |
| XM47            | 0.990<br>(0.997) | 0.991<br>(0.997) | 0.982<br>(0.988) | 0.979<br>(0.990) | 0.981<br>(0.990) | 0.986<br>(0.993) | ID               | 0.987<br>(0.997) | 0.986<br>(0.997) | 0.563<br>(0.500) | 0.619<br>(0.628) | 0.614<br>(0.644) | 0.727<br>(0.829) | 0.964<br>(0.993) | 0.743<br>(0.825) | 0.742<br>(0.834) | 0.968<br>(0.995) | 0.968<br>(0.997) |
| YN45            | 0.986<br>(1.000) | 0.985<br>(1.000) | 0.975<br>(0.990) | 0.988<br>(0.993) | 0.986<br>(0.993) | 0.979<br>(0.995) | 0.987<br>(0.997) | ID               | 0.996<br>(1.000) | 0.564<br>(0.500) | 0.617<br>(0.628) | 0.616<br>(0.644) | 0.724<br>(0.827) | 0.964<br>(0.995) | 0.742<br>(0.822) | 0.745<br>(0.832) | 0.966<br>(0.997) | 0.963<br>(1.000) |
| GZ488           | 0.986<br>(1.000) | 0.986<br>(1.000) | 0.976<br>(0.990) | 0.992<br>(0.993) | 0.986<br>(0.993) | 0.980<br>(0.995) | 0.986<br>(0.997) | 0.996<br>(1.000) | ID               | 0.562<br>(0.500) | 0.616<br>(0.628) | 0.614<br>(0.644) | 0.728<br>(0.827) | 0.965<br>(0.995) | 0.739<br>(0.822) | 0.745<br>(0.832) | 0.965<br>(0.997) | 0.964<br>(1.000) |
| NC_038514.<br>1 | 0.560<br>(0.500) | 0.563<br>(0.500) | 0.554<br>(0.495) | 0.556<br>(0.495) | 0.558<br>(0.495) | 0.558<br>(0.500) | 0.563<br>(0.500) | 0.564<br>(0.500) | 0.562<br>(0.500) | ID               | 0.576<br>(0.519) | 0.561<br>(0.524) | 0.569<br>(0.516) | 0.559<br>(0.500) | 0.569<br>(0.511) | 0.571<br>(0.513) | 0.558<br>(0.502) | 0.557<br>(0.500) |

|            |                  |                  |                  |                  |                  |                  |                  |                  |                  |                  |                  |                  |                  |                  |                  |                  |                  |                  |
|------------|------------------|------------------|------------------|------------------|------------------|------------------|------------------|------------------|------------------|------------------|------------------|------------------|------------------|------------------|------------------|------------------|------------------|------------------|
| MG923674.1 | 0.620<br>(0.628) | 0.621<br>(0.628) | 0.616<br>(0.623) | 0.615<br>(0.625) | 0.616<br>(0.625) | 0.618<br>(0.623) | 0.619<br>(0.628) | 0.617<br>(0.628) | 0.616<br>(0.628) | 0.576<br>(0.519) | ID               | 0.681<br>(0.736) | 0.619<br>(0.609) | 0.611<br>(0.632) | 0.622<br>(0.602) | 0.608<br>(0.609) | 0.611<br>(0.630) | 0.618<br>(0.628) |
| MN258253.1 | 0.617<br>(0.644) | 0.617<br>(0.644) | 0.613<br>(0.637) | 0.611<br>(0.639) | 0.610<br>(0.639) | 0.612<br>(0.639) | 0.614<br>(0.644) | 0.616<br>(0.644) | 0.614<br>(0.644) | 0.561<br>(0.524) | 0.681<br>(0.736) | ID               | 0.636<br>(0.648) | 0.617<br>(0.644) | 0.618<br>(0.644) | 0.631<br>(0.646) | 0.618<br>(0.646) | 0.617<br>(0.644) |
| MN478397.1 | 0.726<br>(0.827) | 0.727<br>(0.827) | 0.721<br>(0.820) | 0.721<br>(0.820) | 0.721<br>(0.820) | 0.730<br>(0.825) | 0.727<br>(0.829) | 0.724<br>(0.827) | 0.728<br>(0.827) | 0.569<br>(0.516) | 0.619<br>(0.609) | 0.636<br>(0.648) | ID               | 0.731<br>(0.827) | 0.842<br>(0.983) | 0.860<br>(0.976) | 0.724<br>(0.829) | 0.732<br>(0.827) |
| MK360784.1 | 0.965<br>(0.995) | 0.964<br>(0.995) | 0.956<br>(0.986) | 0.957<br>(0.988) | 0.958<br>(0.988) | 0.961<br>(0.990) | 0.964<br>(0.993) | 0.964<br>(0.995) | 0.965<br>(0.995) | 0.559<br>(0.500) | 0.611<br>(0.632) | 0.617<br>(0.644) | 0.731<br>(0.827) | ID               | 0.742<br>(0.822) | 0.742<br>(0.832) | 0.961<br>(0.993) | 0.972<br>(0.995) |
| KY978755.1 | 0.740<br>(0.822) | 0.742<br>(0.822) | 0.736<br>(0.815) | 0.731<br>(0.815) | 0.734<br>(0.815) | 0.740<br>(0.820) | 0.743<br>(0.825) | 0.742<br>(0.822) | 0.739<br>(0.822) | 0.569<br>(0.511) | 0.622<br>(0.602) | 0.618<br>(0.644) | 0.842<br>(0.983) | 0.742<br>(0.822) | ID               | 0.853<br>(0.967) | 0.743<br>(0.825) | 0.742<br>(0.822) |
| U37768.1   | 0.743<br>(0.832) | 0.744<br>(0.832) | 0.735<br>(0.825) | 0.737<br>(0.825) | 0.736<br>(0.825) | 0.742<br>(0.829) | 0.742<br>(0.834) | 0.745<br>(0.832) | 0.745<br>(0.832) | 0.571<br>(0.513) | 0.608<br>(0.609) | 0.631<br>(0.646) | 0.860<br>(0.976) | 0.742<br>(0.832) | 0.853<br>(0.967) | ID               | 0.740<br>(0.834) | 0.742<br>(0.832) |
| JX853575.1 | 0.968<br>(0.997) | 0.967<br>(0.997) | 0.959<br>(0.988) | 0.958<br>(0.990) | 0.963<br>(0.990) | 0.963<br>(0.993) | 0.968<br>(0.995) | 0.966<br>(0.997) | 0.965<br>(0.997) | 0.558<br>(0.502) | 0.611<br>(0.630) | 0.618<br>(0.646) | 0.724<br>(0.829) | 0.961<br>(0.993) | 0.743<br>(0.825) | 0.740<br>(0.834) | ID               | 0.963<br>(0.997) |
| JX879769.1 | 0.967<br>(1.000) | 0.968<br>(1.000) | 0.958<br>(0.990) | 0.956<br>(0.993) | 0.959<br>(0.993) | 0.964<br>(0.995) | 0.968<br>(0.997) | 0.963<br>(1.000) | 0.964<br>(1.000) | 0.557<br>(0.500) | 0.618<br>(0.628) | 0.617<br>(0.644) | 0.732<br>(0.827) | 0.972<br>(0.995) | 0.742<br>(0.822) | 0.742<br>(0.832) | 0.963<br>(0.997) | ID               |

Amino acid identity is showed in bracket.

NC\_038514.1: Laibin virus sequence.

MG923674.1: Puumala orthohantavirus sequence.

MN258253.1: Andes orthohantavirus sequence

MN478397.1, KY978755.1, U37768.1: Hantaan virus sequences.

MK360784.1, JX853575.1, JX879769.1: Seoul virus sequences.

#### Additional file 4. Nucleotide and amino acid identities of the near full-length M segments

|       | YY27             | GZ325            | GZ473            | GZ488            | GZ15             | MM23             | GZ45             | XM47             | YN45             | KP645<br>197.1   | JX879<br>768.1   | KM948<br>593.1   | NC_005<br>237.1  | MK513<br>900.1   | MN639<br>750.1   | MK548<br>658.1   | AF3456<br>36.2   | U3772<br>9.1     | MK064<br>115.1   |
|-------|------------------|------------------|------------------|------------------|------------------|------------------|------------------|------------------|------------------|------------------|------------------|------------------|------------------|------------------|------------------|------------------|------------------|------------------|------------------|
| YY27  | ID               | 0.985<br>(0.995) | 0.968<br>(0.994) | 0.968<br>(0.994) | 0.990<br>(0.995) | 0.969<br>(0.993) | 0.986<br>(0.995) | 0.985<br>(0.990) | 0.968<br>(0.995) | 0.957<br>(0.993) | 0.950<br>(0.989) | 0.947<br>(0.992) | 0.956<br>(0.988) | 0.573<br>(0.537) | 0.588<br>(0.536) | 0.718<br>(0.767) | 0.716<br>(0.762) | 0.720<br>(0.770) | 0.541<br>(0.450) |
| GZ325 | 0.985<br>(0.995) | ID               | 0.968<br>(0.999) | 0.968<br>(0.999) | 0.984<br>(0.998) | 0.969<br>(0.998) | 0.995<br>(0.998) | 0.985<br>(0.993) | 0.969<br>(0.998) | 0.959<br>(0.998) | 0.952<br>(0.991) | 0.947<br>(0.995) | 0.958<br>(0.992) | 0.574<br>(0.536) | 0.586<br>(0.537) | 0.720<br>(0.767) | 0.717<br>(0.762) | 0.721<br>(0.770) | 0.538<br>(0.451) |
| GZ473 | 0.968<br>(0.994) | 0.968<br>(0.999) | ID               | 0.999<br>(1.000) | 0.969<br>(0.997) | 0.991<br>(0.997) | 0.968<br>(0.997) | 0.968<br>(0.992) | 0.991<br>(0.997) | 0.954<br>(0.999) | 0.947<br>(0.990) | 0.941<br>(0.994) | 0.952<br>(0.991) | 0.577<br>(0.535) | 0.588<br>(0.537) | 0.720<br>(0.766) | 0.718<br>(0.761) | 0.723<br>(0.769) | 0.541<br>(0.452) |
| GZ488 | 0.968<br>(0.994) | 0.968<br>(0.999) | 0.999<br>(1.000) | ID               | 0.969<br>(0.997) | 0.991<br>(0.997) | 0.968<br>(0.997) | 0.968<br>(0.992) | 0.990<br>(0.997) | 0.954<br>(0.999) | 0.947<br>(0.990) | 0.941<br>(0.994) | 0.952<br>(0.991) | 0.577<br>(0.535) | 0.588<br>(0.537) | 0.721<br>(0.766) | 0.719<br>(0.761) | 0.724<br>(0.769) | 0.541<br>(0.452) |
| GZ15  | 0.990<br>(0.995) | 0.984<br>(0.998) | 0.969<br>(0.997) | 0.969<br>(0.997) | ID               | 0.969<br>(0.996) | 0.984<br>(0.998) | 0.984<br>(0.993) | 0.967<br>(0.996) | 0.955<br>(0.996) | 0.949<br>(0.991) | 0.945<br>(0.995) | 0.955<br>(0.990) | 0.575<br>(0.537) | 0.588<br>(0.536) | 0.720<br>(0.767) | 0.717<br>(0.762) | 0.722<br>(0.770) | 0.541<br>(0.451) |
| MM23  | 0.969<br>(0.993) | 0.969<br>(0.998) | 0.991<br>(0.997) | 0.991<br>(0.997) | 0.969<br>(0.996) | ID               | 0.969<br>(0.996) | 0.969<br>(0.991) | 0.990<br>(0.996) | 0.957<br>(0.996) | 0.950<br>(0.991) | 0.944<br>(0.993) | 0.953<br>(0.990) | 0.577<br>(0.537) | 0.587<br>(0.539) | 0.720<br>(0.767) | 0.718<br>(0.762) | 0.723<br>(0.770) | 0.540<br>(0.450) |

|             |                  |                  |                  |                  |                  |                  |                  |                  |                  |                  |                  |                  |                  |                  |                  |                  |                  |                  |                  |    |
|-------------|------------------|------------------|------------------|------------------|------------------|------------------|------------------|------------------|------------------|------------------|------------------|------------------|------------------|------------------|------------------|------------------|------------------|------------------|------------------|----|
| GZ45        | 0.986<br>(0.995) | 0.995<br>(0.998) | 0.968<br>(0.997) | 0.968<br>(0.997) | 0.984<br>(0.998) | 0.969<br>(0.996) | ID               | 0.986<br>(0.993) | 0.968<br>(0.996) | 0.959<br>(0.996) | 0.952<br>(0.991) | 0.947<br>(0.995) | 0.957<br>(0.991) | 0.573<br>(0.535) | 0.585<br>(0.535) | 0.720<br>(0.766) | 0.717<br>(0.761) | 0.721<br>(0.769) | 0.538<br>(0.450) |    |
| XM47        | 0.985<br>(0.990) | 0.985<br>(0.993) | 0.968<br>(0.992) | 0.968<br>(0.992) | 0.984<br>(0.993) | 0.969<br>(0.991) | 0.986<br>(0.993) | ID               | 0.967<br>(0.991) | 0.955<br>(0.991) | 0.947<br>(0.987) | 0.945<br>(0.990) | 0.954<br>(0.986) | 0.571<br>(0.533) | 0.586<br>(0.536) | 0.718<br>(0.767) | 0.716<br>(0.760) | 0.720<br>(0.768) | 0.540<br>(0.450) |    |
| YN45        | 0.968<br>(0.995) | 0.969<br>(0.998) | 0.991<br>(0.997) | 0.990<br>(0.997) | 0.967<br>(0.996) | 0.990<br>(0.996) | 0.968<br>(0.996) | 0.967<br>(0.991) | ID               | 0.954<br>(0.996) | 0.947<br>(0.989) | 0.941<br>(0.993) | 0.953<br>(0.990) | 0.578<br>(0.535) | 0.587<br>(0.536) | 0.719<br>(0.767) | 0.718<br>(0.762) | 0.723<br>(0.770) | 0.541<br>(0.450) |    |
| KP645197.1  | 0.957<br>(0.993) | 0.959<br>(0.998) | 0.954<br>(0.999) | 0.954<br>(0.999) | 0.955<br>(0.996) | 0.957<br>(0.996) | 0.959<br>(0.996) | 0.955<br>(0.991) | 0.954<br>(0.996) | ID               | 0.951<br>(0.989) | 0.945<br>(0.993) | 0.957<br>(0.990) | 0.576<br>(0.535) | 0.586<br>(0.537) | 0.713<br>(0.767) | 0.717<br>(0.762) | 0.719<br>(0.770) | 0.541<br>(0.452) |    |
| JX879768.1  | 0.950<br>(0.989) | 0.952<br>(0.991) | 0.947<br>(0.990) | 0.947<br>(0.990) | 0.949<br>(0.991) | 0.950<br>(0.991) | 0.952<br>(0.991) | 0.947<br>(0.987) | 0.947<br>(0.989) | 0.951<br>(0.989) | ID               | 0.965<br>(0.990) | 0.949<br>(0.984) | 0.574<br>(0.537) | 0.589<br>(0.536) | 0.715<br>(0.764) | 0.718<br>(0.758) | 0.718<br>(0.767) | 0.539<br>(0.450) |    |
| KM948593.1  | 0.947<br>(0.992) | 0.947<br>(0.995) | 0.941<br>(0.994) | 0.941<br>(0.994) | 0.945<br>(0.995) | 0.944<br>(0.993) | 0.947<br>(0.995) | 0.945<br>(0.990) | 0.941<br>(0.993) | 0.945<br>(0.993) | 0.965<br>(0.990) | ID               | 0.948<br>(0.988) | 0.574<br>(0.537) | 0.586<br>(0.538) | 0.712<br>(0.763) | 0.715<br>(0.758) | 0.713<br>(0.767) | 0.541<br>(0.452) |    |
| NC_005237.1 | 0.956<br>(0.988) | 0.958<br>(0.992) | 0.952<br>(0.991) | 0.952<br>(0.991) | 0.955<br>(0.990) | 0.953<br>(0.990) | 0.957<br>(0.991) | 0.954<br>(0.986) | 0.953<br>(0.990) | 0.957<br>(0.990) | 0.949<br>(0.984) | 0.948<br>(0.988) | ID               | 0.575<br>(0.533) | 0.587<br>(0.535) | 0.718<br>(0.766) | 0.718<br>(0.761) | 0.718<br>(0.769) | 0.535<br>(0.450) |    |
| MK513900.1  | 0.573<br>(0.537) | 0.574<br>(0.536) | 0.577<br>(0.535) | 0.577<br>(0.535) | 0.575<br>(0.537) | 0.577<br>(0.537) | 0.573<br>(0.535) | 0.571<br>(0.533) | 0.578<br>(0.535) | 0.576<br>(0.535) | 0.574<br>(0.537) | 0.574<br>(0.537) | 0.575<br>(0.533) | ID               | 0.668<br>(0.667) | 0.580<br>(0.540) | 0.581<br>(0.540) | 0.578<br>(0.541) | 0.542<br>(0.466) |    |
| MN639750.1  | 0.588<br>(0.536) | 0.586<br>(0.537) | 0.588<br>(0.537) | 0.588<br>(0.537) | 0.588<br>(0.536) | 0.587<br>(0.539) | 0.585<br>(0.535) | 0.586<br>(0.536) | 0.587<br>(0.536) | 0.586<br>(0.537) | 0.589<br>(0.536) | 0.586<br>(0.538) | 0.587<br>(0.535) | 0.668<br>(0.667) | ID               | 0.576<br>(0.544) | 0.583<br>(0.546) | 0.575<br>(0.545) | 0.542<br>(0.461) |    |
| MK548658.1  | 0.718<br>(0.767) | 0.720<br>(0.767) | 0.720<br>(0.766) | 0.721<br>(0.766) | 0.720<br>(0.767) | 0.720<br>(0.767) | 0.720<br>(0.766) | 0.718<br>(0.767) | 0.719<br>(0.767) | 0.713<br>(0.767) | 0.715<br>(0.764) | 0.712<br>(0.763) | 0.718<br>(0.766) | 0.580<br>(0.540) | 0.576<br>(0.544) | ID               | 0.839<br>(0.962) | 0.942<br>(0.984) | 0.548<br>(0.455) |    |
| AF345636.2  | 0.716<br>(0.762) | 0.717<br>(0.762) | 0.718<br>(0.761) | 0.719<br>(0.761) | 0.717<br>(0.762) | 0.718<br>(0.762) | 0.717<br>(0.761) | 0.716<br>(0.760) | 0.718<br>(0.762) | 0.717<br>(0.762) | 0.718<br>(0.758) | 0.715<br>(0.758) | 0.718<br>(0.761) | 0.581<br>(0.540) | 0.583<br>(0.546) | 0.839<br>(0.962) | ID               | 0.839<br>(0.960) | 0.554<br>(0.452) |    |
| U37729.1    | 0.720<br>(0.770) | 0.721<br>(0.770) | 0.723<br>(0.769) | 0.724<br>(0.769) | 0.722<br>(0.770) | 0.723<br>(0.770) | 0.721<br>(0.769) | 0.720<br>(0.768) | 0.723<br>(0.770) | 0.719<br>(0.770) | 0.718<br>(0.767) | 0.713<br>(0.767) | 0.718<br>(0.769) | 0.578<br>(0.541) | 0.575<br>(0.545) | 0.942<br>(0.984) | 0.839<br>(0.960) | ID               | 0.542<br>(0.455) |    |
| MK064115.1  | 0.541<br>(0.450) | 0.538<br>(0.451) | 0.541<br>(0.452) | 0.541<br>(0.452) | 0.541<br>(0.451) | 0.540<br>(0.450) | 0.538<br>(0.450) | 0.540<br>(0.450) | 0.541<br>(0.450) | 0.541<br>(0.450) | 0.541<br>(0.452) | 0.539<br>(0.450) | 0.541<br>(0.452) | 0.535<br>(0.450) | 0.542<br>(0.466) | 0.542<br>(0.461) | 0.548<br>(0.455) | 0.554<br>(0.452) | 0.542<br>(0.455) | ID |

Amino acid identity is showed in bracket.

KP645197.1, JX879768.1, KM948593.1, NC\_005237.1: Seoul virus sequences.

MK513900.1: Andes orthohantavirus sequence.

MN639750.1: Puumala orthohantavirus sequence.

MK548658.1, AF345636.2, U37729.1: Hantaan virus sequences.

MK064115.1: Laibin virus sequence.

#### Additional file 5. Nucleotide and amino acid identities of the near full-length L segments

|            | KT885<br>047.1   | AB574<br>184.1   | GU904<br>039.1   | MN850<br>097.1   | NC_03<br>8515.1  | KM948<br>596.1   | KM948<br>594.1   | KP6451<br>96.1   | JX853<br>574.1   | EF190<br>551.1   | MK360<br>807.1   | GZ325            | GZ473            | GZ15             | MM23             | YN45             | GZ45             | XM47             | YY27             | GZ488            |
|------------|------------------|------------------|------------------|------------------|------------------|------------------|------------------|------------------|------------------|------------------|------------------|------------------|------------------|------------------|------------------|------------------|------------------|------------------|------------------|------------------|
| KT885047.1 | ID               | 0.668<br>(0.690) | 0.746<br>(0.852) | 0.658<br>(0.684) | 0.633<br>(0.641) | 0.741<br>(0.851) | 0.741<br>(0.852) | 0.741<br>(0.852) | 0.740<br>(0.853) | 0.741<br>(0.850) | 0.742<br>(0.852) | 0.745<br>(0.853) | 0.745<br>(0.855) | 0.746<br>(0.854) | 0.713<br>(0.831) | 0.746<br>(0.854) | 0.744<br>(0.852) | 0.745<br>(0.854) | 0.737<br>(0.847) | 0.744<br>(0.854) |
| AB574184.1 | 0.668<br>(0.690) | ID               | 0.666<br>(0.698) | 0.710<br>(0.769) | 0.644<br>(0.648) | 0.663<br>(0.679) | 0.662<br>(0.681) | 0.662<br>(0.682) | 0.661<br>(0.681) | 0.661<br>(0.680) | 0.663<br>(0.681) | 0.662<br>(0.682) | 0.663<br>(0.682) | 0.661<br>(0.683) | 0.631<br>(0.647) | 0.662<br>(0.683) | 0.661<br>(0.680) | 0.662<br>(0.683) | 0.660<br>(0.678) | 0.662<br>(0.682) |

|             |                  |                  |                  |                  |                  |                  |                  |                  |                  |                  |                  |                  |                  |                  |                  |                  |                  |                  |                  |                  |
|-------------|------------------|------------------|------------------|------------------|------------------|------------------|------------------|------------------|------------------|------------------|------------------|------------------|------------------|------------------|------------------|------------------|------------------|------------------|------------------|------------------|
| GU904039.1  | 0.746<br>(0.852) | 0.666<br>(0.698) | ID               | 0.655<br>(0.683) | 0.637<br>(0.646) | 0.748<br>(0.855) | 0.747<br>(0.856) | 0.750<br>(0.856) | 0.746<br>(0.857) | 0.748<br>(0.853) | 0.747<br>(0.856) | 0.747<br>(0.857) | 0.750<br>(0.858) | 0.748<br>(0.857) | 0.714<br>(0.861) | 0.748<br>(0.857) | 0.746<br>(0.855) | 0.748<br>(0.857) | 0.744<br>(0.851) | 0.749<br>(0.857) |
| MN850097.1  | 0.658<br>(0.684) | 0.710<br>(0.769) | 0.655<br>(0.683) | ID               | 0.637<br>(0.638) | 0.660<br>(0.674) | 0.661<br>(0.676) | 0.658<br>(0.675) | 0.658<br>(0.676) | 0.658<br>(0.675) | 0.661<br>(0.675) | 0.661<br>(0.676) | 0.663<br>(0.676) | 0.662<br>(0.677) | 0.633<br>(0.642) | 0.662<br>(0.675) | 0.660<br>(0.675) | 0.663<br>(0.676) | 0.656<br>(0.672) | 0.661<br>(0.675) |
| NC_038515.1 | 0.633<br>(0.641) | 0.644<br>(0.648) | 0.637<br>(0.646) | 0.637<br>(0.638) | ID               | 0.634<br>(0.637) | 0.633<br>(0.638) | 0.636<br>(0.638) | 0.636<br>(0.639) | 0.635<br>(0.636) | 0.633<br>(0.638) | 0.637<br>(0.638) | 0.636<br>(0.638) | 0.636<br>(0.638) | 0.606<br>(0.606) | 0.637<br>(0.638) | 0.636<br>(0.638) | 0.636<br>(0.639) | 0.631<br>(0.637) | 0.635<br>(0.637) |
| KM948596.1  | 0.741<br>(0.851) | 0.663<br>(0.679) | 0.748<br>(0.855) | 0.660<br>(0.674) | 0.634<br>(0.637) | ID               | 0.961<br>(0.990) | 0.944<br>(0.989) | 0.945<br>(0.989) | 0.947<br>(0.986) | 0.961<br>(0.989) | 0.955<br>(0.989) | 0.955<br>(0.991) | 0.956<br>(0.990) | 0.909<br>(0.940) | 0.954<br>(0.990) | 0.954<br>(0.988) | 0.955<br>(0.988) | 0.992<br>(0.992) | 0.952<br>(0.988) |
| KM948594.1  | 0.741<br>(0.852) | 0.662<br>(0.681) | 0.747<br>(0.856) | 0.661<br>(0.676) | 0.633<br>(0.638) | 0.961<br>(0.990) | ID               | 0.941<br>(0.989) | 0.943<br>(0.989) | 0.943<br>(0.986) | 0.997<br>(0.999) | 0.954<br>(0.990) | 0.952<br>(0.991) | 0.954<br>(0.990) | 0.908<br>(0.941) | 0.952<br>(0.990) | 0.953<br>(0.989) | 0.953<br>(0.988) | 0.954<br>(0.992) | 0.950<br>(0.988) |
| KP645196.1  | 0.741<br>(0.852) | 0.662<br>(0.682) | 0.750<br>(0.856) | 0.658<br>(0.675) | 0.636<br>(0.638) | 0.944<br>(0.989) | 0.941<br>(0.989) | ID               | 0.971<br>(0.994) | 0.975<br>(0.991) | 0.941<br>(0.989) | 0.944<br>(0.992) | 0.946<br>(0.994) | 0.943<br>(0.993) | 0.902<br>(0.943) | 0.946<br>(0.992) | 0.943<br>(0.991) | 0.945<br>(0.991) | 0.937<br>(0.981) | 0.944<br>(0.991) |
| JX853574.1  | 0.740<br>(0.853) | 0.661<br>(0.681) | 0.746<br>(0.857) | 0.658<br>(0.676) | 0.636<br>(0.639) | 0.945<br>(0.989) | 0.943<br>(0.989) | 0.971<br>(0.994) | ID               | 0.972<br>(0.991) | 0.943<br>(0.988) | 0.946<br>(0.992) | 0.946<br>(0.994) | 0.945<br>(0.993) | 0.901<br>(0.943) | 0.947<br>(0.993) | 0.946<br>(0.991) | 0.946<br>(0.991) | 0.938<br>(0.981) | 0.944<br>(0.991) |
| EF190551.1  | 0.741<br>(0.850) | 0.661<br>(0.680) | 0.748<br>(0.853) | 0.658<br>(0.675) | 0.635<br>(0.636) | 0.947<br>(0.986) | 0.943<br>(0.986) | 0.975<br>(0.991) | 0.972<br>(0.991) | ID               | 0.943<br>(0.985) | 0.947<br>(0.989) | 0.947<br>(0.991) | 0.946<br>(0.990) | 0.903<br>(0.940) | 0.947<br>(0.990) | 0.946<br>(0.988) | 0.947<br>(0.988) | 0.940<br>(0.978) | 0.944<br>(0.988) |
| MK360807.1  | 0.742<br>(0.852) | 0.663<br>(0.681) | 0.747<br>(0.856) | 0.661<br>(0.675) | 0.633<br>(0.638) | 0.961<br>(0.989) | 0.997<br>(0.999) | 0.941<br>(0.989) | 0.943<br>(0.988) | 0.943<br>(0.985) | ID               | 0.954<br>(0.989) | 0.953<br>(0.990) | 0.955<br>(0.989) | 0.909<br>(0.940) | 0.952<br>(0.989) | 0.954<br>(0.988) | 0.954<br>(0.987) | 0.954<br>(0.981) | 0.951<br>(0.987) |
| GZ325       | 0.745<br>(0.853) | 0.662<br>(0.682) | 0.747<br>(0.857) | 0.661<br>(0.676) | 0.637<br>(0.638) | 0.955<br>(0.989) | 0.954<br>(0.990) | 0.944<br>(0.992) | 0.946<br>(0.992) | 0.947<br>(0.989) | 0.954<br>(0.989) | ID               | 0.982<br>(0.996) | 0.986<br>(0.996) | 0.938<br>(0.947) | 0.983<br>(0.996) | 0.993<br>(0.996) | 0.987<br>(0.996) | 0.950<br>(0.983) | 0.981<br>(0.996) |
| GZ473       | 0.745<br>(0.855) | 0.663<br>(0.682) | 0.750<br>(0.858) | 0.663<br>(0.676) | 0.636<br>(0.638) | 0.955<br>(0.991) | 0.952<br>(0.991) | 0.946<br>(0.994) | 0.946<br>(0.994) | 0.947<br>(0.991) | 0.953<br>(0.990) | 0.982<br>(0.996) | ID               | 0.982<br>(0.997) | 0.942<br>(0.948) | 0.989<br>(0.998) | 0.981<br>(0.995) | 0.982<br>(0.995) | 0.947<br>(0.984) | 0.996<br>(0.996) |
| GZ15        | 0.746<br>(0.854) | 0.661<br>(0.683) | 0.748<br>(0.857) | 0.662<br>(0.677) | 0.636<br>(0.638) | 0.956<br>(0.990) | 0.954<br>(0.990) | 0.943<br>(0.993) | 0.945<br>(0.993) | 0.946<br>(0.990) | 0.955<br>(0.989) | 0.986<br>(0.996) | 0.982<br>(0.997) | ID               | 0.936<br>(0.946) | 0.981<br>(0.995) | 0.985<br>(0.995) | 0.986<br>(0.995) | 0.948<br>(0.982) | 0.980<br>(0.995) |
| MM23        | 0.713<br>(0.831) | 0.631<br>(0.647) | 0.714<br>(0.861) | 0.633<br>(0.642) | 0.606<br>(0.606) | 0.909<br>(0.940) | 0.908<br>(0.941) | 0.902<br>(0.943) | 0.901<br>(0.943) | 0.903<br>(0.940) | 0.909<br>(0.940) | 0.938<br>(0.947) | 0.942<br>(0.948) | 0.936<br>(0.946) | ID               | 0.943<br>(0.948) | 0.937<br>(0.946) | 0.938<br>(0.946) | 0.904<br>(0.935) | 0.944<br>(0.951) |
| YN45        | 0.746<br>(0.854) | 0.662<br>(0.683) | 0.748<br>(0.857) | 0.662<br>(0.675) | 0.637<br>(0.638) | 0.954<br>(0.990) | 0.952<br>(0.990) | 0.946<br>(0.992) | 0.947<br>(0.993) | 0.947<br>(0.990) | 0.952<br>(0.989) | 0.983<br>(0.996) | 0.989<br>(0.998) | 0.981<br>(0.995) | 0.943<br>(0.948) | ID               | 0.982<br>(0.995) | 0.983<br>(0.995) | 0.949<br>(0.984) | 0.988<br>(0.996) |
| GZ45        | 0.744<br>(0.852) | 0.661<br>(0.680) | 0.746<br>(0.855) | 0.660<br>(0.675) | 0.636<br>(0.638) | 0.954<br>(0.988) | 0.953<br>(0.989) | 0.943<br>(0.991) | 0.946<br>(0.991) | 0.946<br>(0.988) | 0.954<br>(0.988) | 0.993<br>(0.996) | 0.981<br>(0.995) | 0.985<br>(0.995) | 0.937<br>(0.946) | 0.982<br>(0.995) | ID               | 0.987<br>(0.995) | 0.949<br>(0.982) | 0.981<br>(0.995) |
| XM47        | 0.745<br>(0.854) | 0.662<br>(0.683) | 0.748<br>(0.857) | 0.663<br>(0.676) | 0.636<br>(0.639) | 0.955<br>(0.988) | 0.953<br>(0.988) | 0.945<br>(0.991) | 0.946<br>(0.991) | 0.947<br>(0.988) | 0.954<br>(0.987) | 0.987<br>(0.996) | 0.982<br>(0.995) | 0.986<br>(0.995) | 0.938<br>(0.946) | 0.983<br>(0.995) | 0.987<br>(0.995) | ID               | 0.949<br>(0.982) | 0.982<br>(0.995) |
| YY27        | 0.737<br>(0.847) | 0.660<br>(0.678) | 0.744<br>(0.851) | 0.656<br>(0.672) | 0.631<br>(0.637) | 0.992<br>(0.992) | 0.954<br>(0.982) | 0.937<br>(0.981) | 0.938<br>(0.981) | 0.940<br>(0.978) | 0.954<br>(0.981) | 0.950<br>(0.983) | 0.947<br>(0.984) | 0.948<br>(0.982) | 0.904<br>(0.935) | 0.949<br>(0.984) | 0.949<br>(0.982) | 0.949<br>(0.982) | ID               | 0.947<br>(0.983) |
| GZ488       | 0.744<br>(0.854) | 0.662<br>(0.682) | 0.749<br>(0.857) | 0.661<br>(0.675) | 0.635<br>(0.637) | 0.952<br>(0.988) | 0.950<br>(0.988) | 0.944<br>(0.991) | 0.944<br>(0.991) | 0.944<br>(0.988) | 0.951<br>(0.987) | 0.981<br>(0.996) | 0.996<br>(0.996) | 0.980<br>(0.995) | 0.944<br>(0.951) | 0.988<br>(0.996) | 0.981<br>(0.995) | 0.982<br>(0.995) | 0.947<br>(0.983) | ID               |

Amino acid identity is showed in bracket.

KT885047.1: Hantaan virus sequence.

AB574184.1: Puumala virus sequence.

GU904039.1: Dobrava-Belgrade virus sequence.

MN850097.1: Andes orthohantavirus virus sequence.

NC\_038515.1: Laibin virus sequence.

KM948596.1, KM948594.1, KP645196.1, JX853574.1, EF190551.1, MK360807.1: Seoul virus sequences.
